# Supplementary material for: Investigation of Donor-like State Distributions in Solution-Processed IZO Thin-Film Transistor through Photocurrent Analysis
Source: MDPI journal article supplement (doi:10.3390/nano13232986), 2023-11-21
Supplement: s1 [file s1]

Figure S1. UV/Vis. light absorption characteristics of solution-processed metal-oxide films fabricated with different Zn:In molarity ratios.

Figure S2. Transfer characteristics of solution-processed IZO TFTs under a light wavelength irradiation. The drain voltage is biased at 20 V, representing the saturation condition. (a)–(g) depict the transfer curves for seven different In molarity ratios: (a) 0.0125 M, (b) 0.025 M, (c) 0.05 M, (d) 0.1 M, (e) 0.125 M, (f) 0.15 M, and (g) 0.2 M, while maintaining a constant Zn molarity of 0.25 M.

Figure S3. Threshold voltage extraction in solution-processed IZO TFTs through square-root drain current versus gate voltage analysis. Drain current was measured under illumination with light wavelength ranging from 1200 to 340 nm. (a)–(g) correspond to the distinct In molarity ratios: (a) 0.0125 M, (b) 0.025 M, (c) 0.05 M, (d) 0.1 M, (e) 0.125 M, (f) 0.15 M, and (g) 0.2 M, with a consistent Zn molarity ratio of 0.25 M.

Figure S4. Threshold voltage characteristics in response to varying photon energies and their respective differentials. (a)–(g) illustrate these characteristics for different In molarity ratios, corresponding to 0.0125 M, 0.025 M, 0.05 M, 0.1 M, 0.125 M, 0.15 M, and 0.2 M, respectively.

Figure S5. Photocurrent spectroscopy analysis of solution-processed IZO TFTs with respect to the different In molarity ratios. (a)–(g) represent the photocurrent spectroscopy results for In molarity ratios of 0.0125 M, 0.025 M, 0.05 M, 0.1 M, 0.125 M, 0.15 M, and 0.2 M, respectively.

Figure S6. Differential characteristics of Photocurrent depending on photon energy and In molarity ratios. The graphs (a)–(g) correspond to different In molarity ratios of 0.0125 M, 0.025 M, 0.05 M, 0.1 M, 0.125 M, 0.15 M, and 0.2 M, respectively.

Figure S7. Gate-voltage dependent field-effect mobility as a function of In molarity ratio under light wavelength irradiation. (a)–(g) Field-effect mobilities were calculated from the square-root of drain current of IZO TFTs at different In molarity ratios: 0.0125 M, 0.025 M, 0.05 M, 0.1 M, 0.125 M, 0.15 M, and 0.2 M.

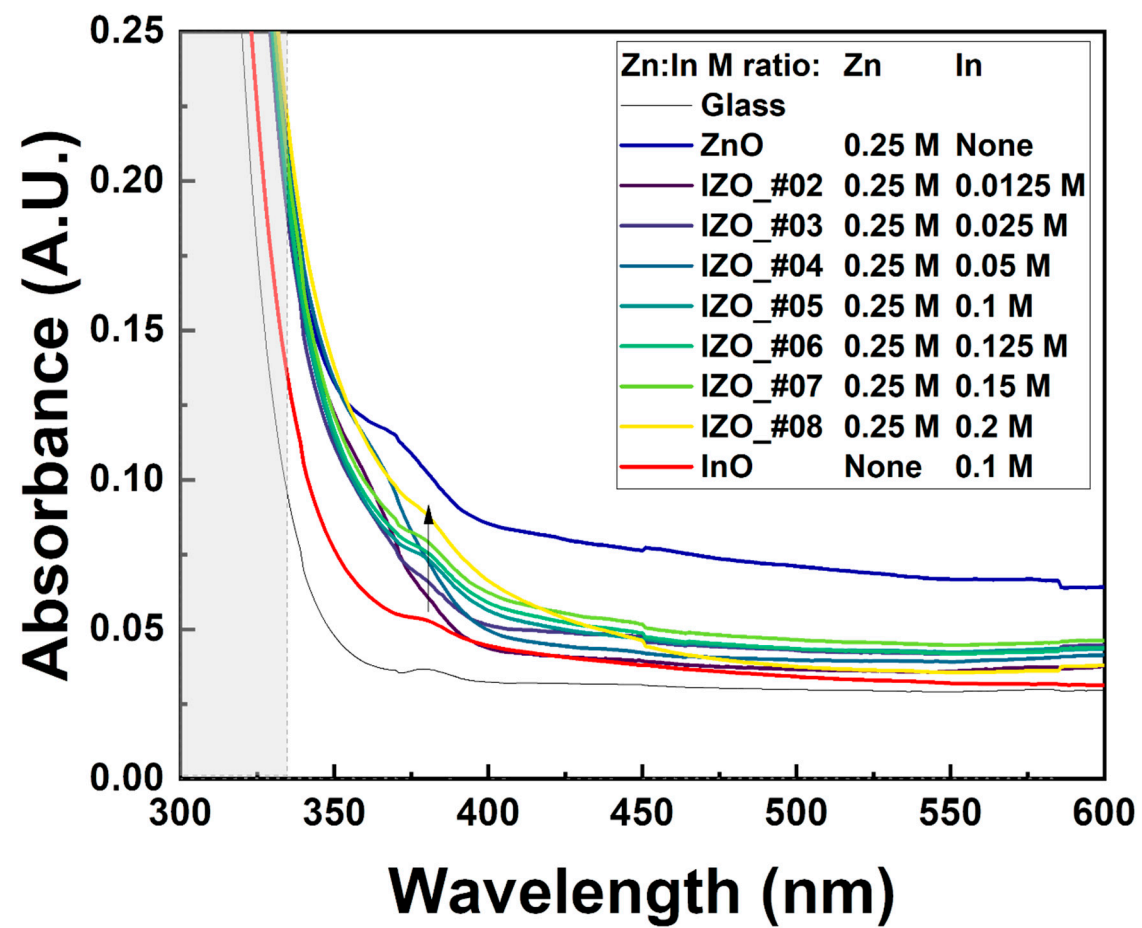

(Figure S1)

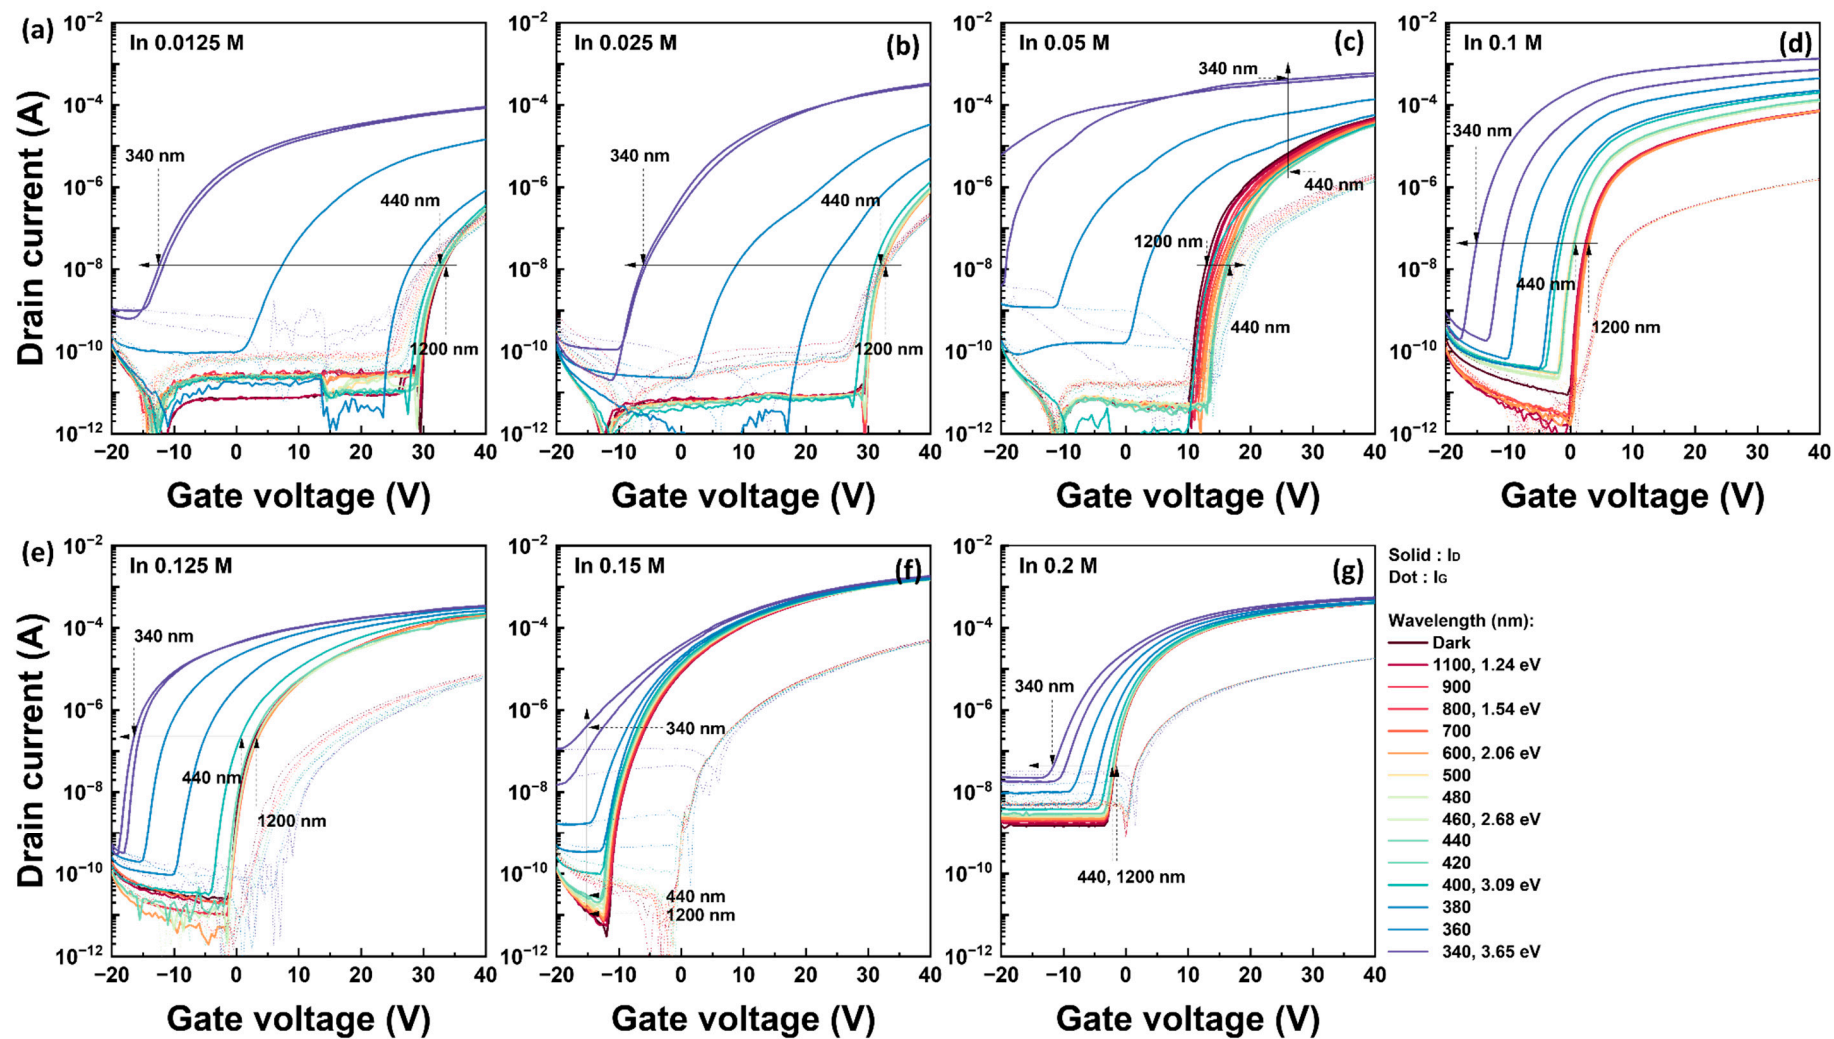

(Figure S2)

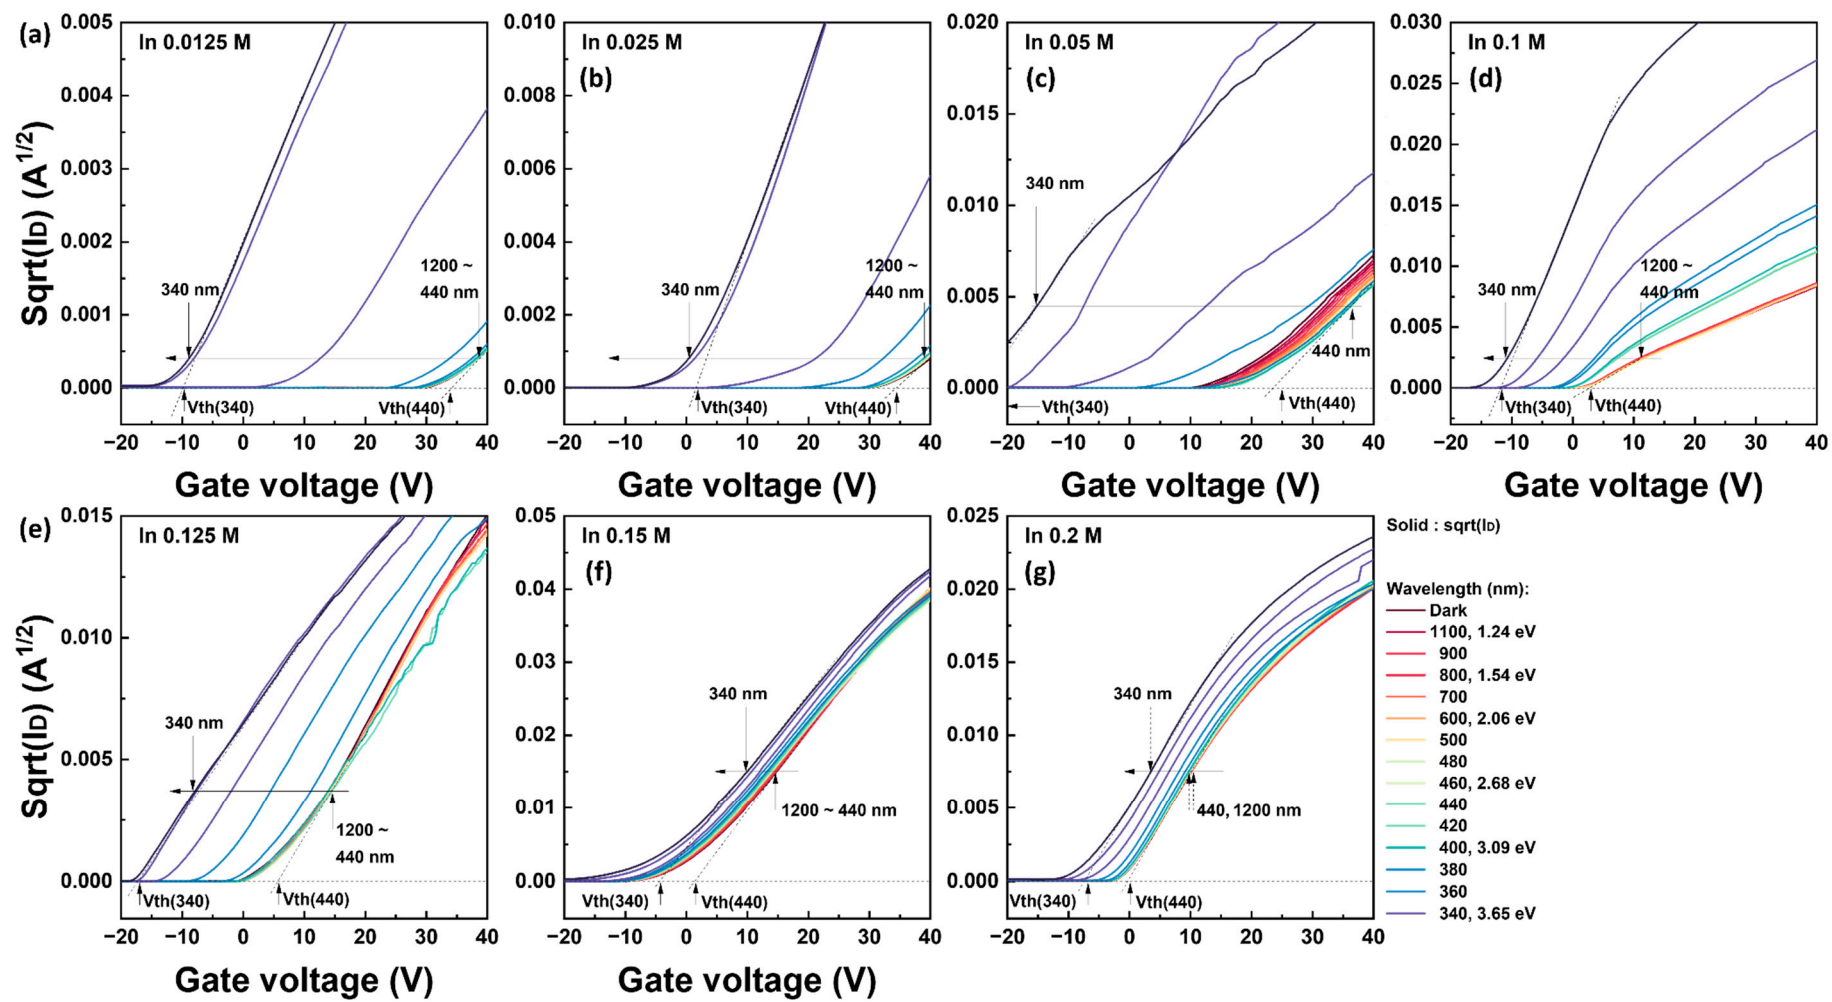

(Figure S3)

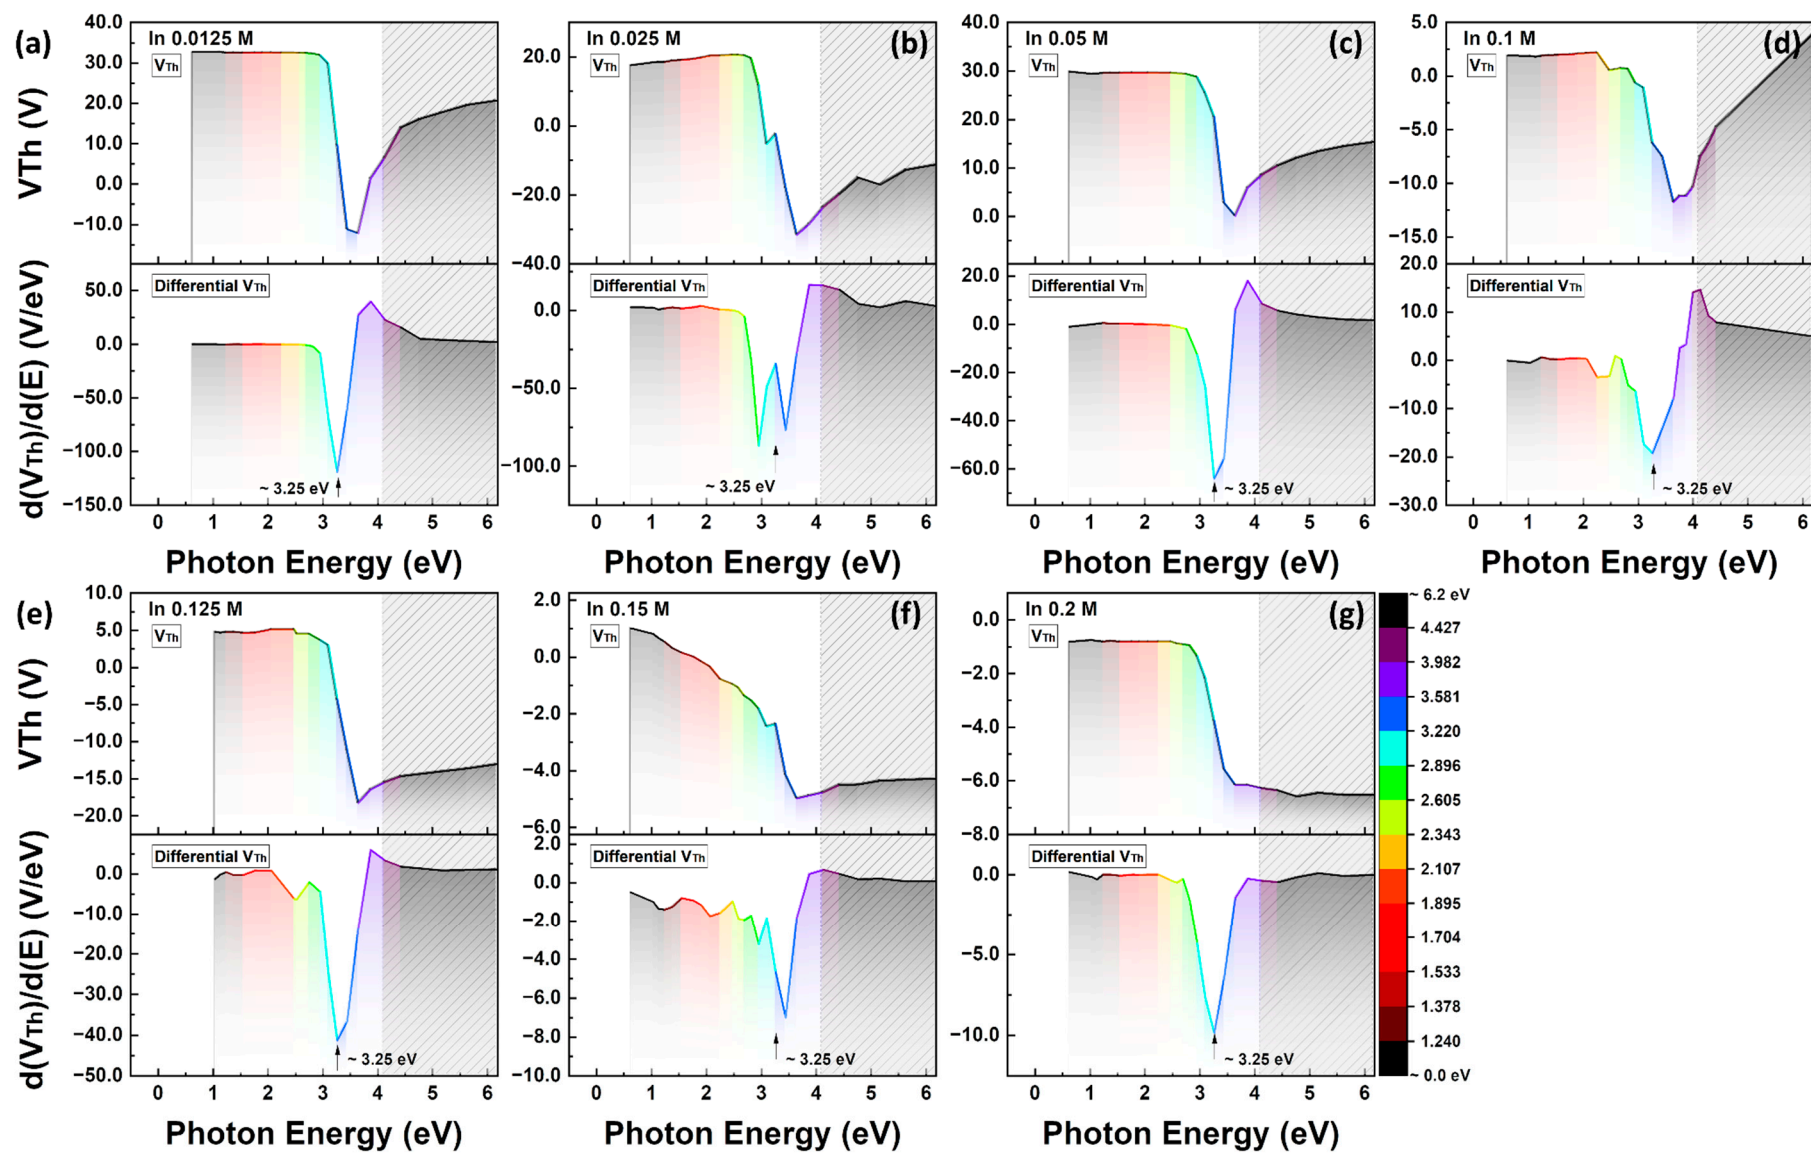

(Figure S4)

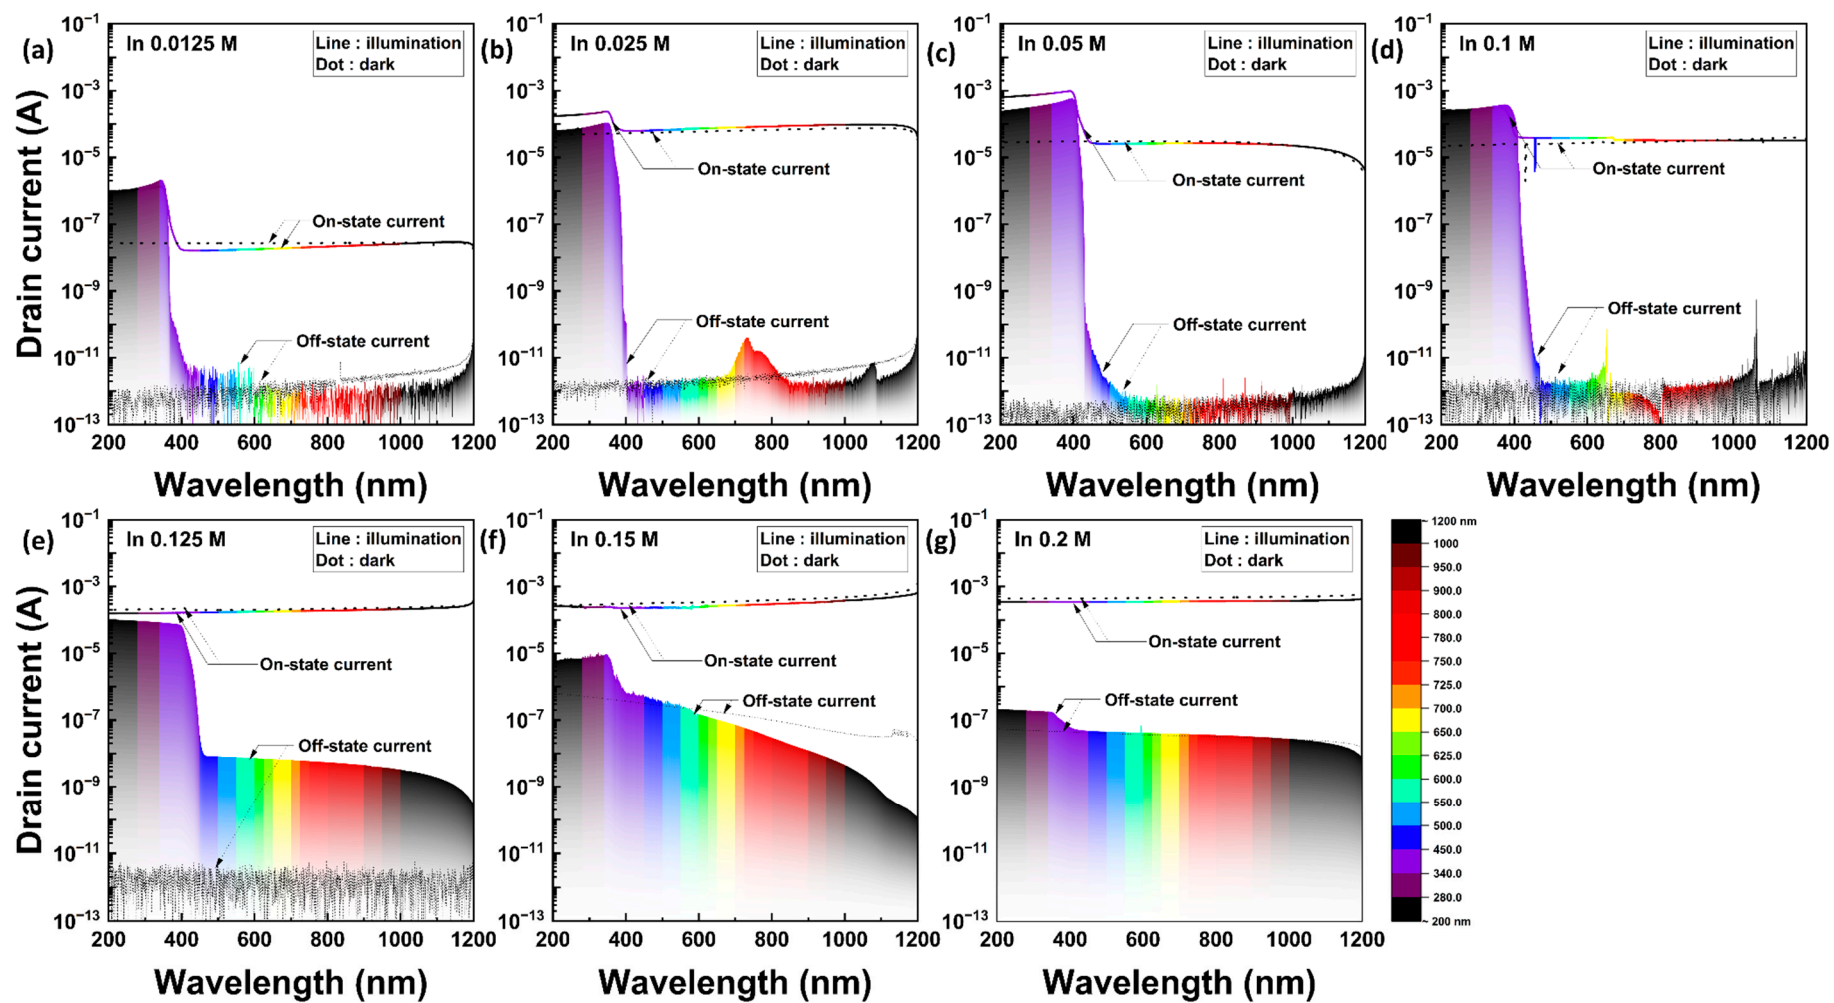

(Figure S5)

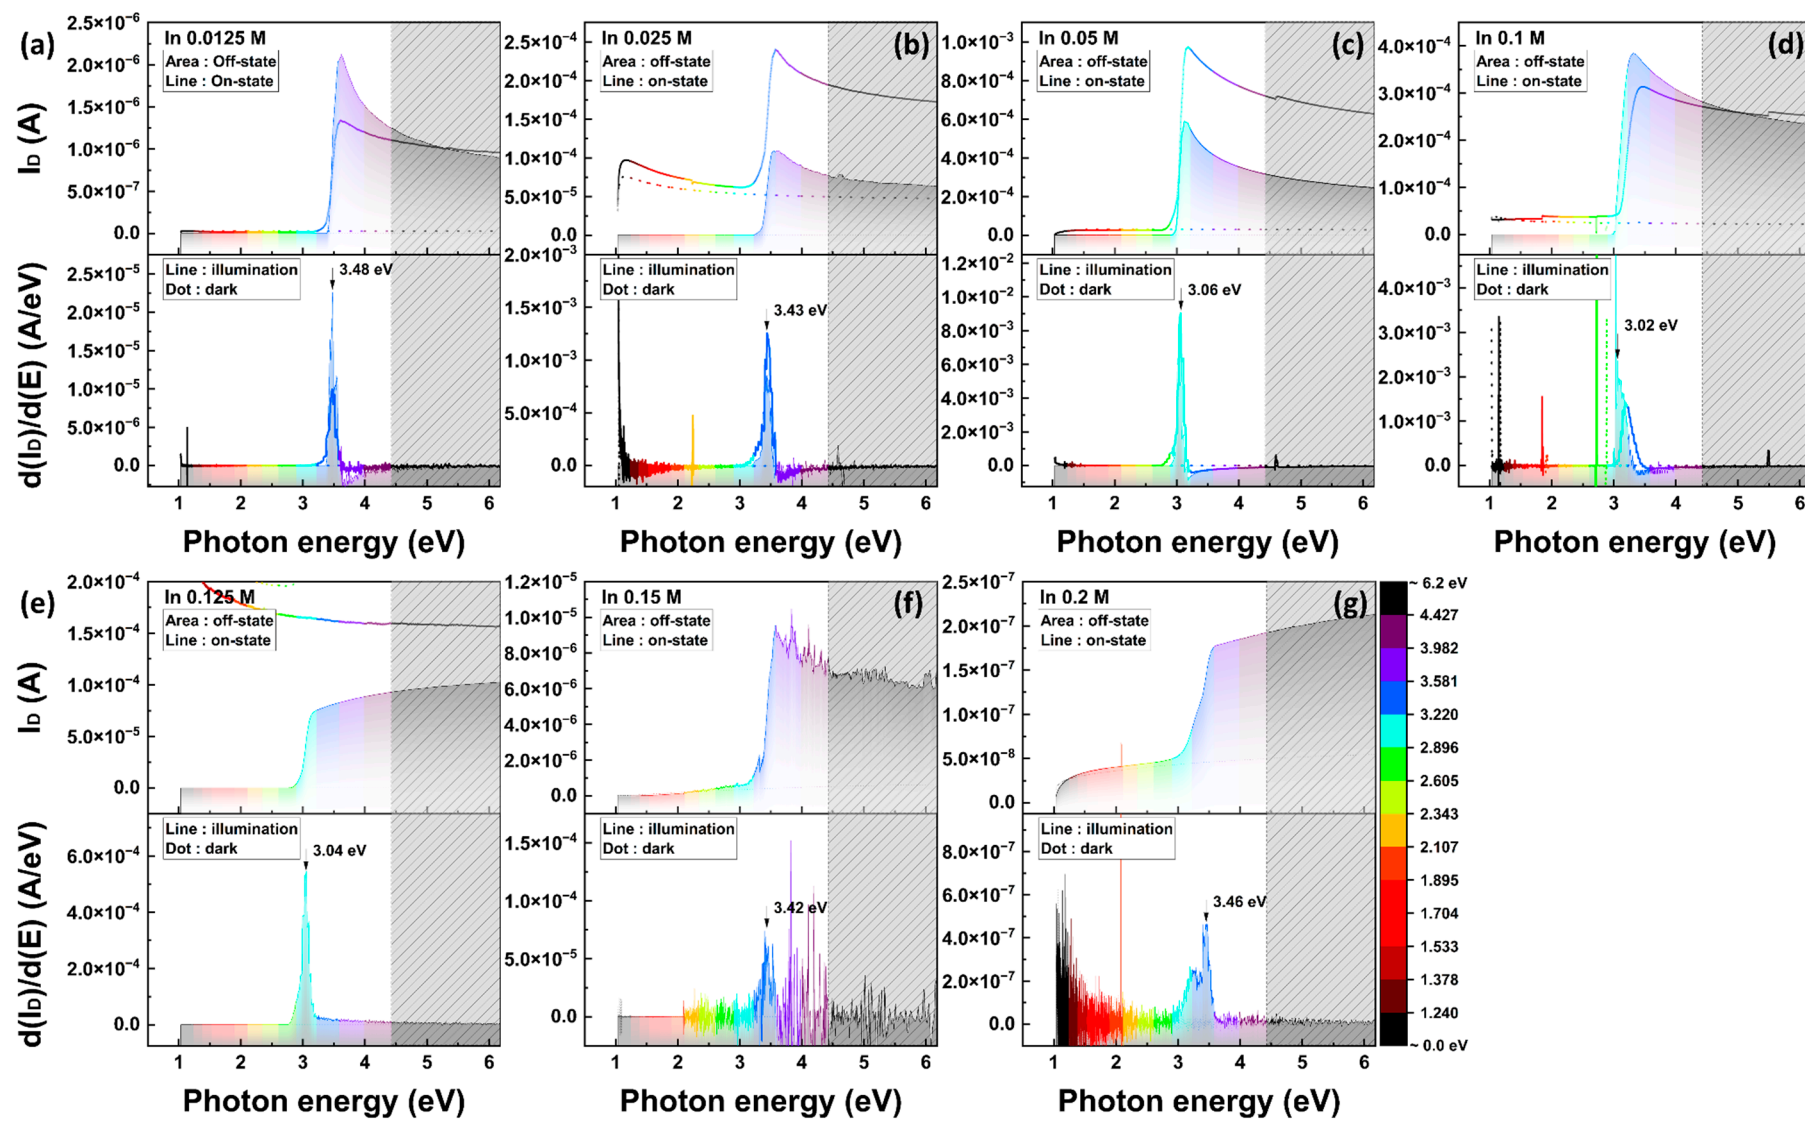

(Figure S6)

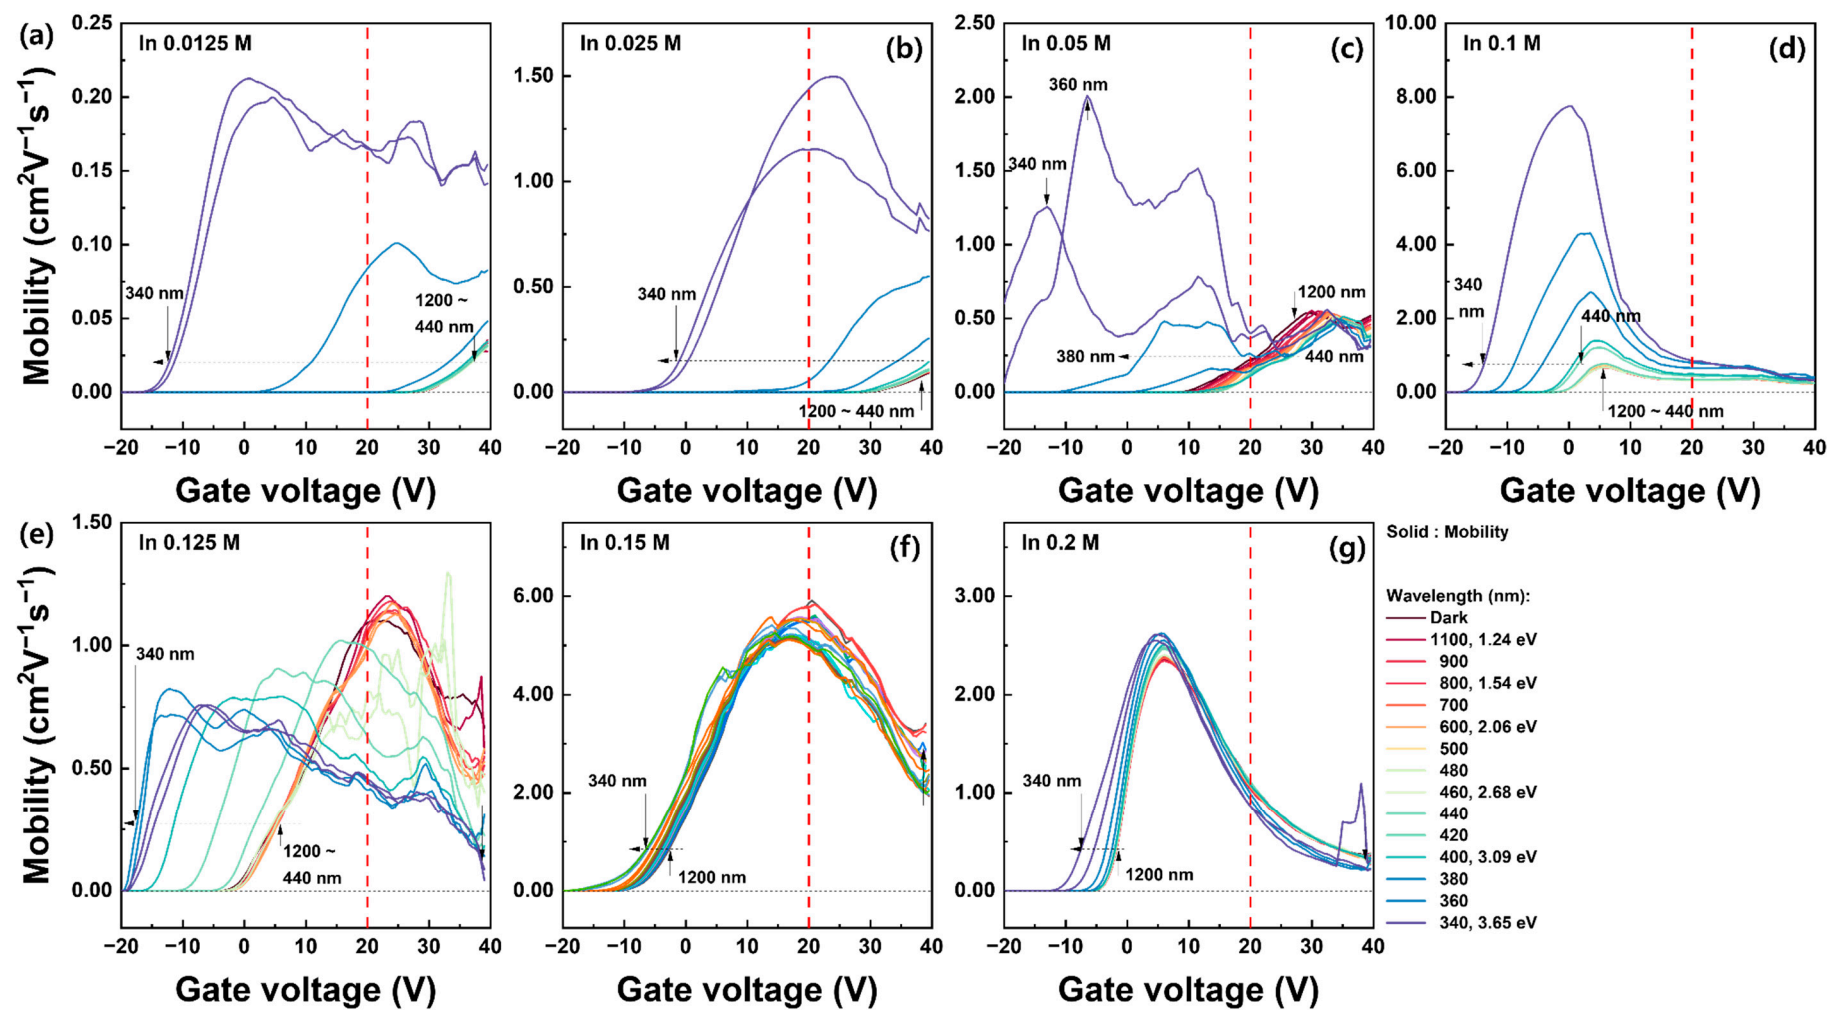

(Figure S7)
